# Supplementary material for: 5-Hydroxy-2,2,6,6-tetramethyl-4-(2-methylprop-1-en-yl)cyclohex-4-ene-1,3-dione, a novel cheletropic trap for nitric oxide EPR detection
Source: Royal Society of Chemistry journal article supplement (doi:10.1039/c002990d), 2010-01-01
Supplement: c002990d.pdf [file c002990d.pdf]

Electronic Supplementary Information for

**5-Hydroxy-2,2,6,6-tetramethyl-4-(2-methylprop-1-en-yl)cyclohex-4-ene-1,3-dione, a novel cheletropic trap for nitric oxide EPR detection**

**Robert Lauricella,<sup>a</sup> Mathilde Triquigneaux,<sup>a</sup> Christiane André-Barrès,<sup>b</sup> Laurence Charles<sup>a</sup> and Béatrice Tuccio\*<sup>a</sup>**

<sup>a</sup> *Laboratoire Chimie Provence, Equipe SACS, Aix-Marseille Université-CNRS-UMR 6264, 13397 Marseille cedex 20, France. Fax: (+33) 491 288 678; Tel: (+33) 491 288 743; E-mail: [beatrice.tuccio-lauricella@univ-provence.fr](mailto:beatrice.tuccio-lauricella@univ-provence.fr)*

<sup>b</sup> *Laboratoire SPCMIB, Université Paul Sabatier-CNRS-UMR 5068, 31062 Toulouse cedex, France.*

## **Table of contents :**

**Figure S1:** Large-scale EPR spectrum of **3**, with its superimposed simulation (as shown in figure 1a). The instrument settings were as follows: non saturating microwave power, 20 mW; modulation amplitude, 0.1 G; receiver gain,  $10^6$ ; time constant, 1.28 ms; scan time, 671 s; 4 scans. The experimental signal is in black dotted lines, its simulation in red full lines.

**Figure S2:** Details of the central line of the EPR spectrum of **3** showing long range hyperfine couplings, and its superimposed simulation obtained with the following parameters:  $a_N = 14.44$  G,  $a_{HY} = 0.46$  G (*3H*),  $a_{HY} = 0.31$  G (*1H*), and  $g = 2.00404$ . The experimental signal is in black dotted lines, its simulation in red full lines.

**Figure S3:** Details of the central line of the EPR spectrum of **3** showing long range hyperfine couplings, and its superimposed simulation performed by considering an exchange between two conformers with the following parameters: first species (60%),  $a_N = 14.44$  G,  $a_{HY} = 0.43$  G (*3H*),  $a_{HY} = 0.25$  G (*1H*), and  $g = 2.004041$ ; second species (40%),  $a_N = 14.45$  G,  $a_{HY} = 0.42$  G (*3H*),  $a_{HY} = 1.00$  G (*1H*), and  $g = 2.004051$ ; exchange rate constant,  $2.64 \times 10^6$  s<sup>-1</sup>. The experimental signal is in black dotted lines, its simulation in red full lines.

**Figure S4:** Enlargement of the baseline of the spectrum shown in fig.S1 revealing the <sup>13</sup>C satellite lines, and its superimposed simulation obtained with the following parameters:  $a_{^{13}C} = 7.8$  G (*1* <sup>13</sup>C) and  $a_{^{13}C} = 3.9$  G (*6* <sup>13</sup>C).

**Figure S5:** Large-scale EPR spectrum of **4** with its superimposed simulation (as shown in figure 2a). The instrument settings were as follows: non saturating microwave power, 20 mW; modulation amplitude, 0.8 G; receiver gain,  $10^5$ ; time constant, 1.28 ms; scan time, 671 s; 9 scans. The experimental signal is in black dotted lines, its simulation in red full lines.

**Figure S6:** Central line of the EPR spectrum of **4** showing long range hyperfine couplings, recorded with in the following conditions: non saturating microwave power, 20 mW; modulation amplitude, 0.2 G; receiver gain,  $2.5 \times 10^6$ ; time constant, 1.28 ms; scan time, 336 s; 6 scans. Its superimposed simulation obtained with the following parameters:  $a_N = 29.80$  G,  $a_{HY} = 0.25$  G (*3H*),  $a_{HY} = 0.17$  G (*1H*), and  $g = 2.00415$ . The experimental signal is in black dotted lines, its simulation in red full lines.

**Figure S7:** Central line of the EPR spectrum of **4** showing long range hyperfine couplings, recorded with in the following conditions: non saturating microwave power, 20 mW; modulation amplitude, 0.2 G; receiver gain,  $2.5 \times 10^6$ ; time constant, 1.28 ms; scan time, 336 s; 6 scans. Its superimposed simulation was performed by considering an exchange between two conformers with the following parameters: first species (70%),  $a_N = 29.80$  G,  $a_{HY} = 0.21$  G (*3H*),  $a_{HY} = 0.22$  G (*1H*), and  $g = 2.004068$ ; second species (30%),  $a_N = 29.80$  G,  $a_{HY} = 0.21$  G (*3H*),  $a_{HY} = 0.68$  G (*1H*), and  $g = 2.004070$ ; exchange rate constant,  $2.83 \times 10^5$  s<sup>-1</sup>. The experimental signal is in black dotted lines, its simulation in red full lines.

**Figure S8:** Enlargement of the baseline of the spectrum shown in fig.S2 revealing <sup>13</sup>C and <sup>15</sup>N satellite lines, and its superimposed simulation obtained with the following parameters:  $a_{^{15}N} = 12.14$  G,  $a_{^{13}C} = 11.27$  G (*1* <sup>13</sup>C),  $a_{^{13}C} = 6.76$  G (*1* <sup>13</sup>C) and  $a_{^{13}C} = 4.83$  G (*1* <sup>13</sup>C). The experimental signal is in black dotted lines, its simulation in red full lines.

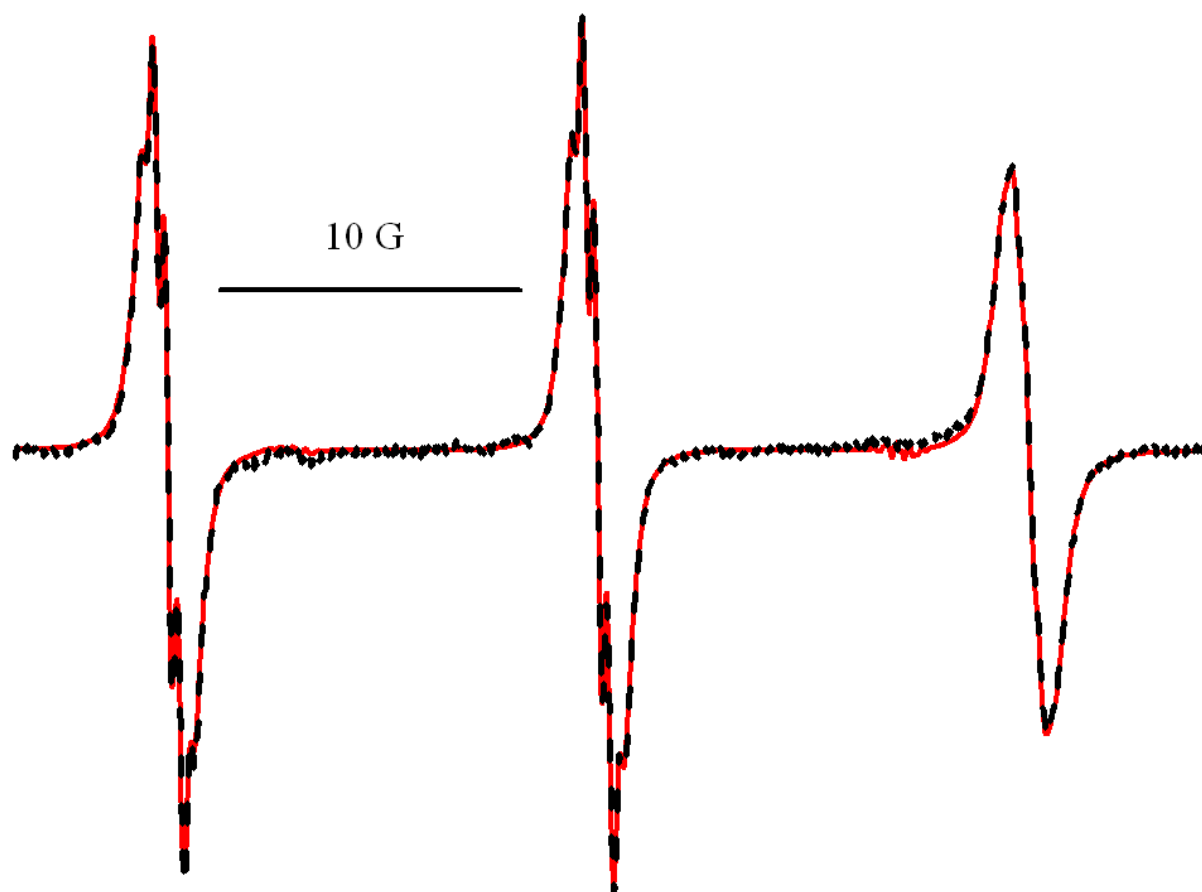

**Figure S1:** Large-scale EPR spectrum of **3**, with its superimposed simulation (as shown in figure 1a). The instrument settings were as follows: non saturating microwave power, 20 mW; modulation amplitude, 0.1 G; receiver gain,  $10^6$ ; time constant, 1.28 ms; scan time, 671 s; 4 scans. The experimental signal is in black dotted lines, its simulation in red full lines.

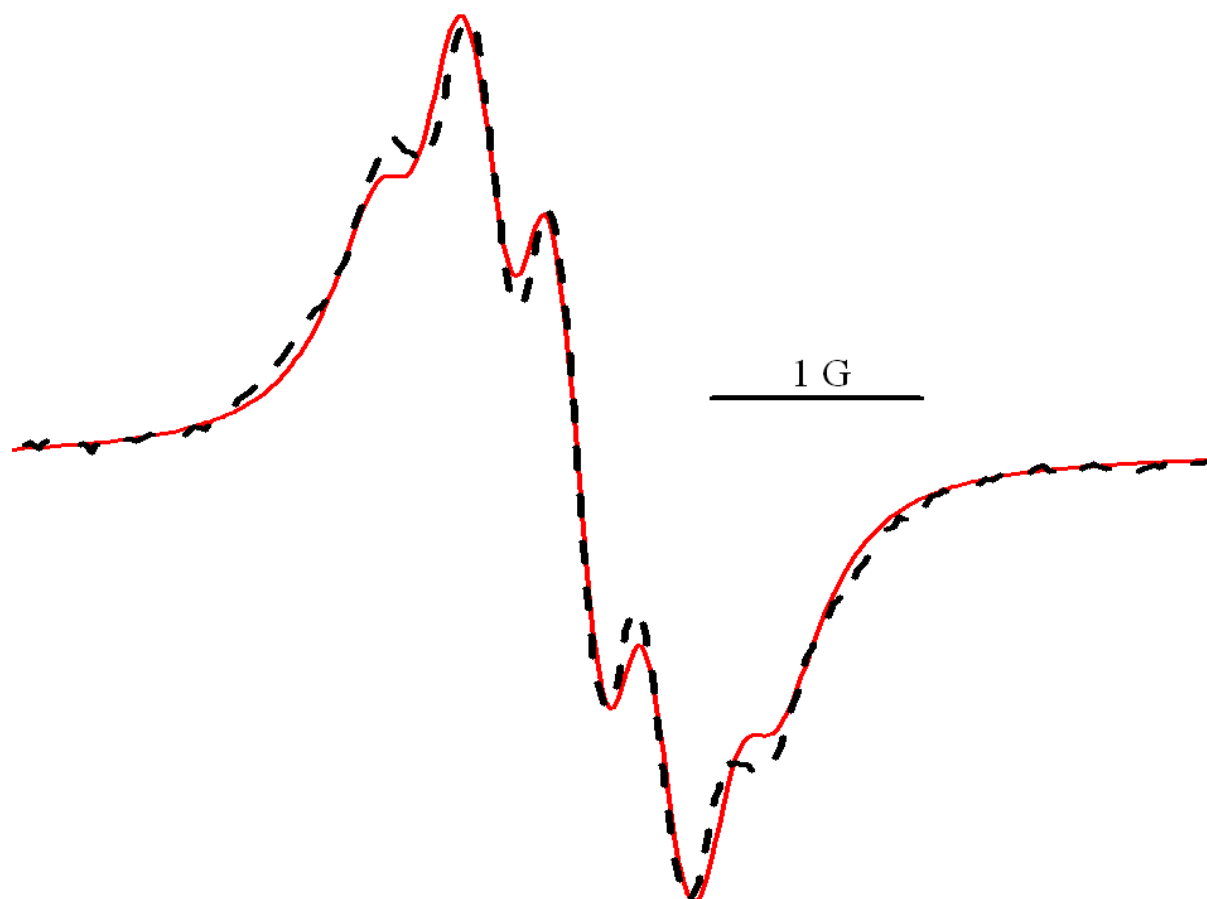

**Figure S2:** Details of the central line of the EPR spectrum of **3** showing long range hyperfine couplings, and its superimposed simulation obtained with the following parameters:  $a_N = 14.44$  G,  $a_{H\gamma} = 0.46$  G ( $3H$ ),  $a_{H\gamma} = 0.31$  G ( $1H$ ), and  $g = 2.00404$ . The experimental signal is in black dotted lines, its simulation in red full lines.

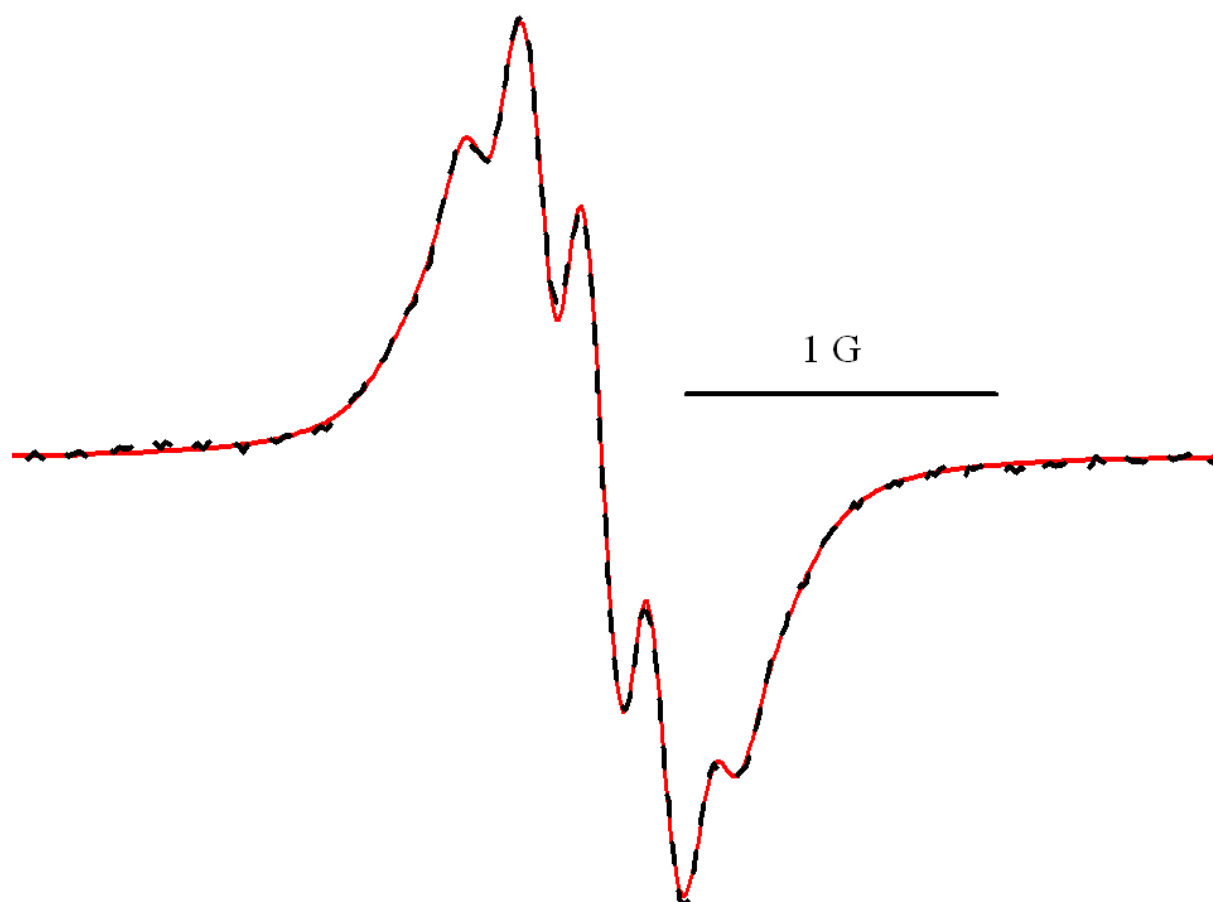

**Figure S3:** Details of the central line of the EPR spectrum of **3** showing long range hyperfine couplings, and its superimposed simulation performed by considering an exchange between two conformers with the following parameters: first species (60%),  $a_N = 14.44$  G,  $a_{H\gamma} = 0.43$  G ( $3H$ ),  $a_{H\gamma} = 0.25$  G ( $1H$ ), and  $g = 2.004041$ ; second species (40%),  $a_N = 14.45$  G,  $a_{H\gamma} = 0.42$  G ( $3H$ ),  $a_{H\gamma} = 1.00$  G ( $1H$ ), and  $g = 2.004051$ ; exchange rate constant,  $2.64 \times 10^6$  s<sup>-1</sup>. The experimental signal is in black dotted lines, its simulation in red full lines.

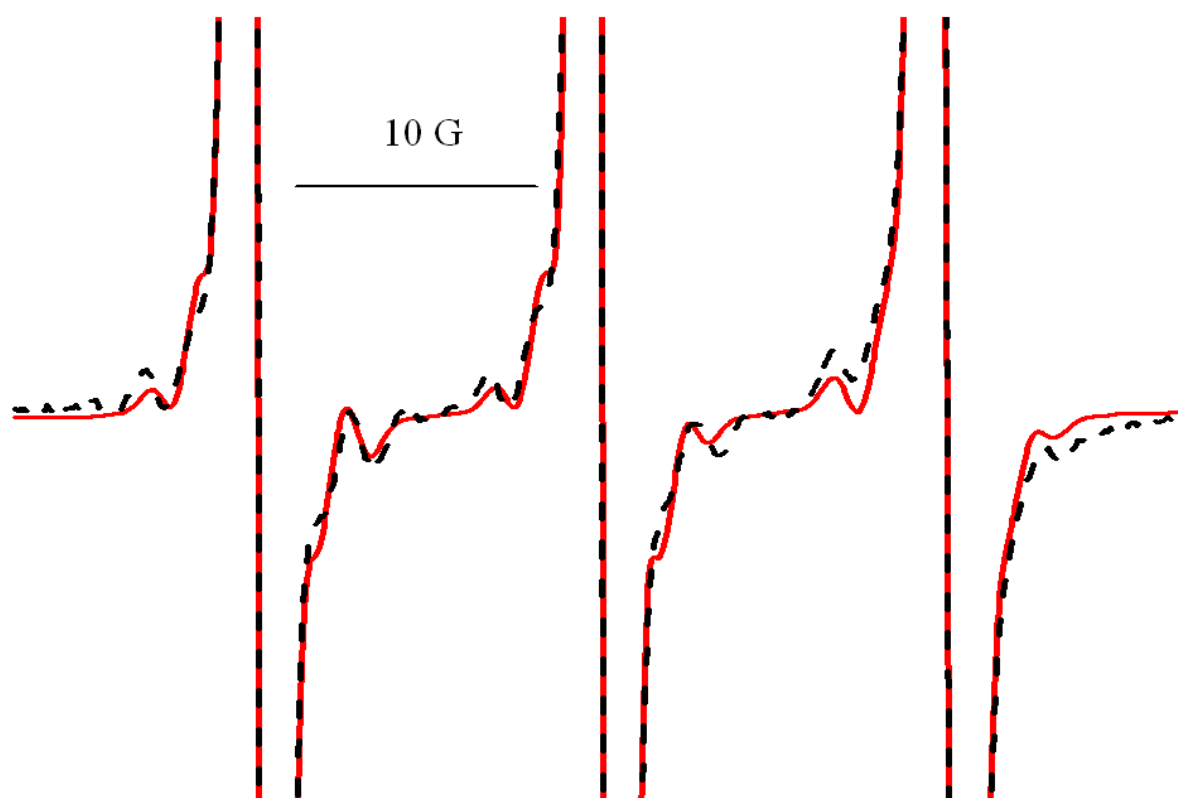

**Figure S4:** Enlargement of the baseline of the spectrum shown in fig.S1 revealing the  $^{13}\text{C}$  satellite lines, and its superimposed simulation obtained with the following parameters:  $a_{^{13}\text{C}} = 7.8 \text{ G}$  ( $1^{13}\text{C}$ ) and  $a_{^{13}\text{C}} = 3.9 \text{ G}$  ( $6^{13}\text{C}$ ).

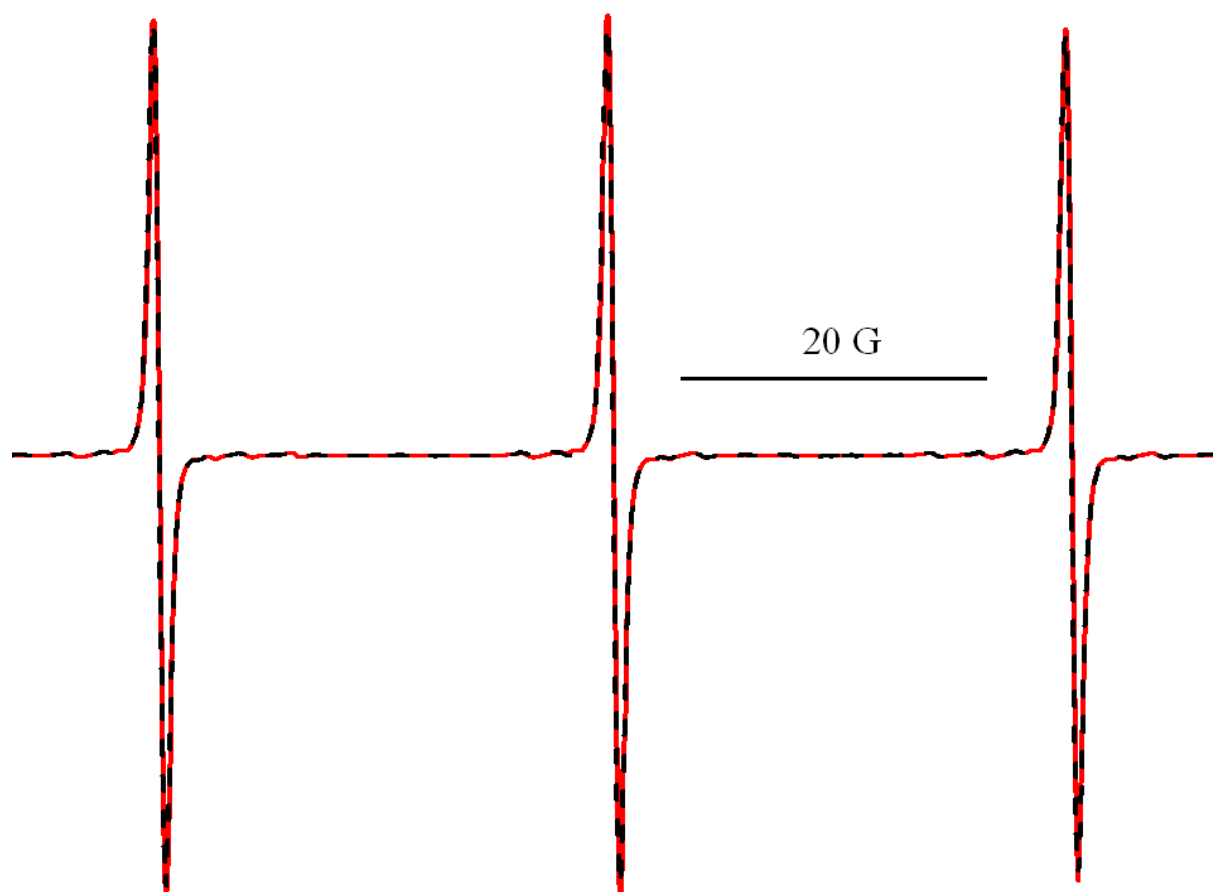

**Figure S5:** Large-scale EPR spectrum of **4** with its superimposed simulation (as shown in figure 2a). The instrument settings were as follows: non saturating microwave power, 20 mW; modulation amplitude, 0.8 G; receiver gain,  $10^5$ ; time constant, 1.28 ms; scan time, 671 s; 9 scans. The experimental signal is in black dotted lines, its simulation in red full lines.

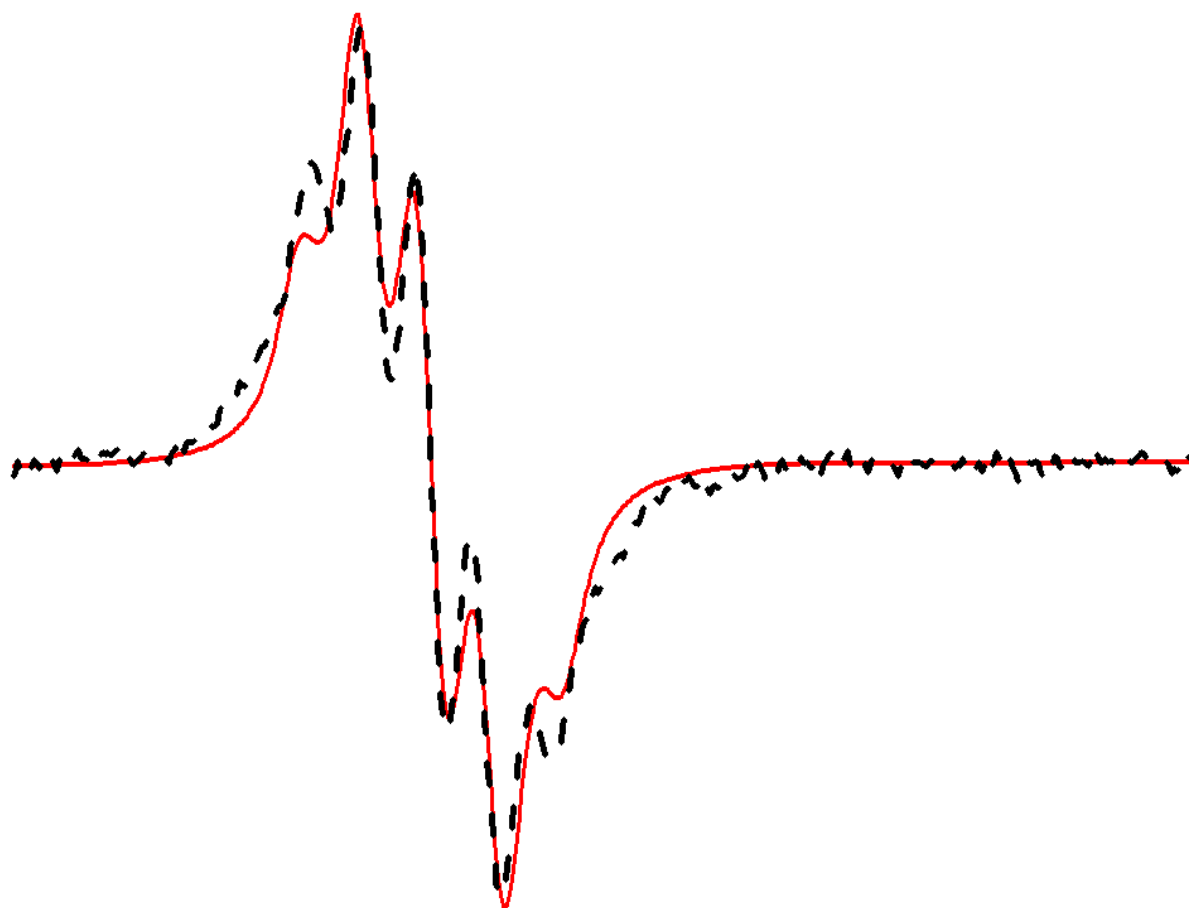

**Figure S6:** Central line of the EPR spectrum of **4** showing long range hyperfine couplings, recorded with in the following conditions: non saturating microwave power, 20 mW; modulation amplitude, 0.2 G; receiver gain,  $2.5 \cdot 10^6$ ; time constant, 1.28 ms; scan time, 336 s; 6 scans. Its superimposed simulation obtained with the following parameters:  $a_N = 29.80$  G,  $a_{H\gamma} = 0.25$  G ( $3H$ ),  $a_{H\gamma} = 0.17$  G ( $1H$ ), and  $g = 2.00415$ . The experimental signal is in black dotted lines, its simulation in red full lines.



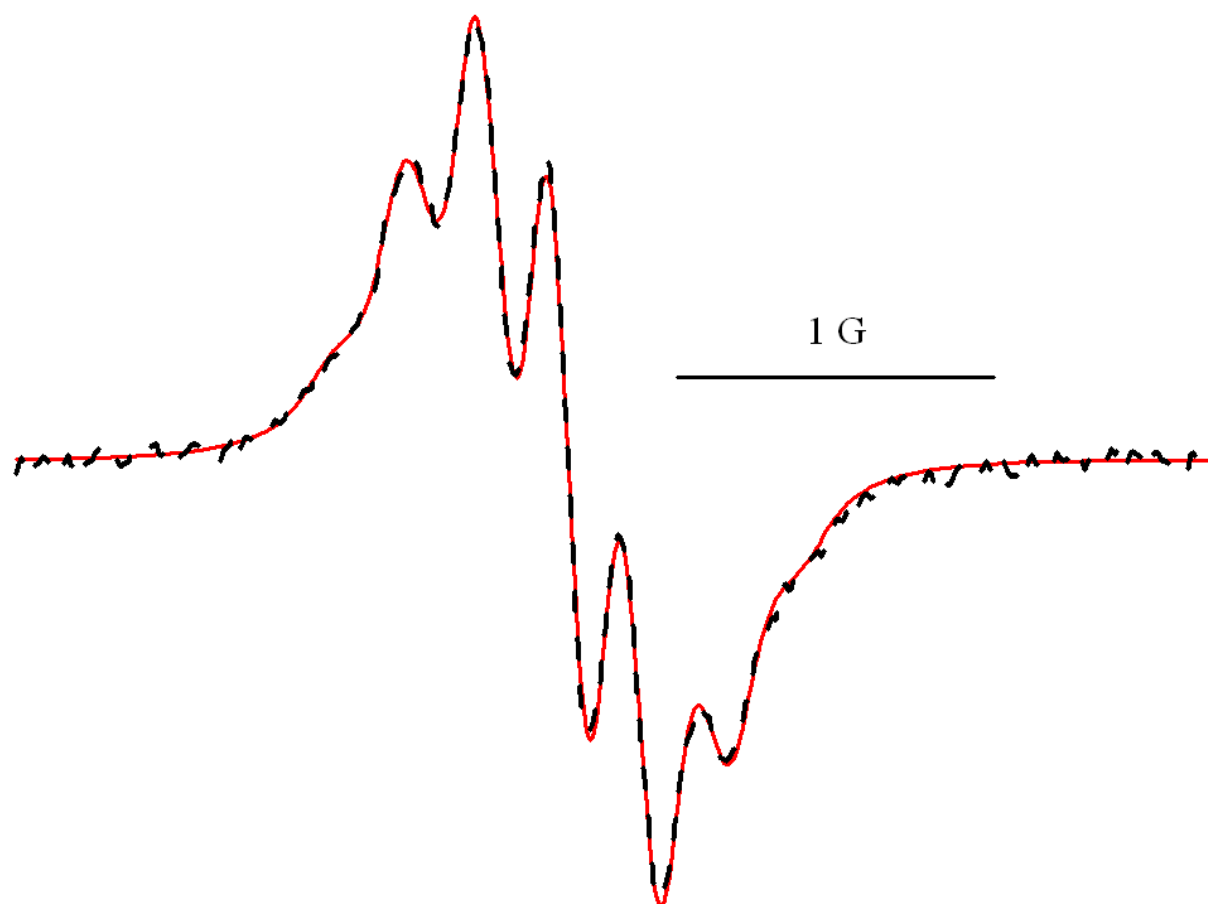

**Figure S7:** Central line of the EPR spectrum of **4** showing long range hyperfine couplings, recorded with in the following conditions: non saturating microwave power, 20 mW; modulation amplitude, 0.2 G; receiver gain,  $2.5 \cdot 10^6$ ; time constant, 1.28 ms; scan time, 336 s; 6 scans. Its superimposed simulation was performed by considering an exchange between two conformers with the following parameters: first species (70%),  $a_N = 29.80$  G,  $a_{H\gamma} = 0.21$  G (3H),  $a_{H\gamma} = 0.22$  G (1H), and  $g = 2.004068$ ; second species (30%),  $a_N = 29.80$  G,  $a_{H\gamma} = 0.21$  G (3H),  $a_{H\gamma} = 0.68$  G (1H), and  $g = 2.004070$ ; exchange rate constant,  $2.83 \cdot 10^5$  s<sup>-1</sup>. The experimental signal is in black dotted lines, its simulation in red full lines.

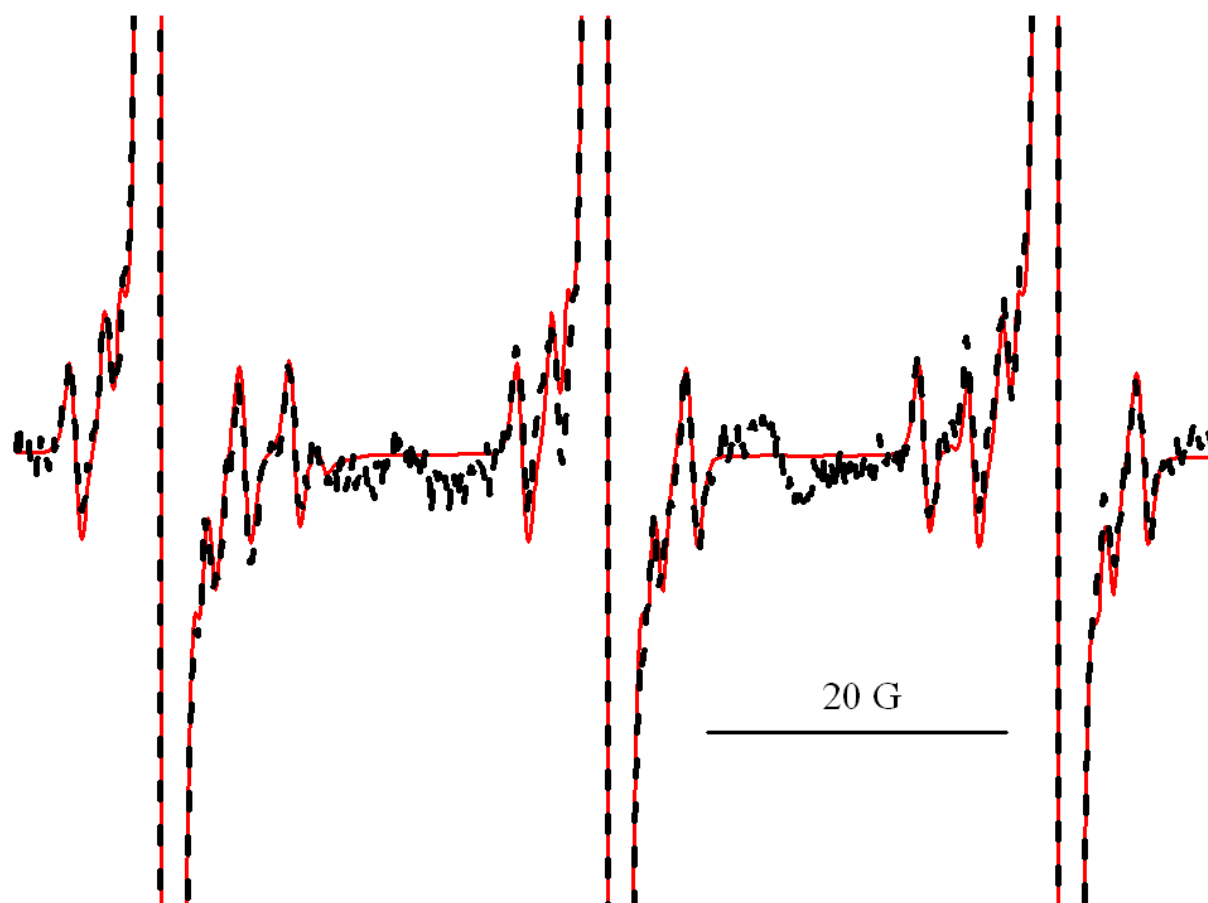

**Figure S8:** Enlargement of the baseline of the spectrum shown in fig.S2 revealing  $^{13}\text{C}$  and  $^{15}\text{N}$  satellite lines, and its superimposed simulation obtained with the following parameters:  $a_{^{15}\text{N}} = 12.14 \text{ G}$ ,  $a_{^{13}\text{C}} = 11.27 \text{ G}$  ( $I^{13}\text{C}$ ),  $a_{^{13}\text{C}} = 6.76 \text{ G}$  ( $I^{13}\text{C}$ ) and  $a_{^{13}\text{C}} = 4.83 \text{ G}$  ( $I^{13}\text{C}$ ). The experimental signal is in black dotted lines, its simulation in red full lines.
